# Supplementary material for: Low Doses of Arsenic in a Mouse Model of Human Exposure and in Neuronal Culture Lead to S-Nitrosylation of Synaptic Proteins and Apoptosis via Nitric Oxide
Source: MDPI journal article supplement (doi:10.3390/ijms21113948), 2020-05-31
Supplement: s1 [file s1]

## Supplementary Materials for

# Low doses of arsenic in a mouse model of human exposure and in neuronal culture lead to S-nitrosylation of synaptic proteins and apoptosis via nitric oxide

Haitham Amal <sup>1\*†</sup>, Guanyu Gong<sup>2†</sup>, Hongmei Yang<sup>2</sup>, Brian A. Joughin<sup>2,3</sup>, Xin Wang<sup>2</sup>, Charles G. Knutson<sup>2</sup>, Maryam Kartawy<sup>1</sup>, Igor Khaliulin<sup>1</sup>, John S. Wishnok<sup>2</sup>, and Steven R. Tannenbaum<sup>2,4\*</sup>

<sup>†</sup> Institute for Drug Research, School of Pharmacy, Faculty of Medicine, The Hebrew University of Jerusalem, Jerusalem 91120, Israel

<sup>2</sup> Department of Biological Engineering, Massachusetts Institute of Technology, Cambridge, MA 02139, USA

<sup>3</sup> Koch Institute for Integrative Cancer Research, Massachusetts Institute of Technology, Cambridge, MA 02139, USA

4 Department of Chemistry, Massachusetts Institute of Technology, Cambridge, MA 02139, USA

† HA and GG have contributed equally to this study.

\* Corresponding Authors: srt@mit.edu, haitham.amal@mail.huji.ac.il

Address: Massachusetts Institute of Technology, 77 Massachusetts Avenue, Room

56-731A Cambridge, MA 02139. Phone: +1-617- 253-3729. Fax: +1-617-252-1787

36

37    Figures S1 – S4

38    Captions for Tables S1 – S4

39    Caption for Movie S1

40

41    **Figs. S1 to S4**

42    **Fig. S1:**

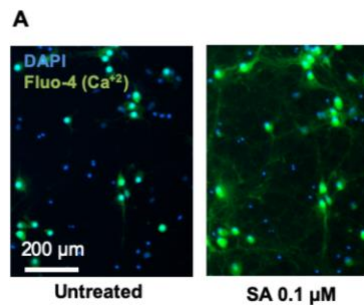

43

44    Changes in calcium were studied using Fluo4 (Ca<sub>2</sub><sup>+</sup>) calcium-sensing dye to track  
45    calcium after treatment of SA 0.1 μM for 5 minutes using primary cultures of mouse  
46    embryonic cortical neurons. Both figures represent the same cells.

47

48

49

50

51

52

53

54

55 **Fig. S2:**

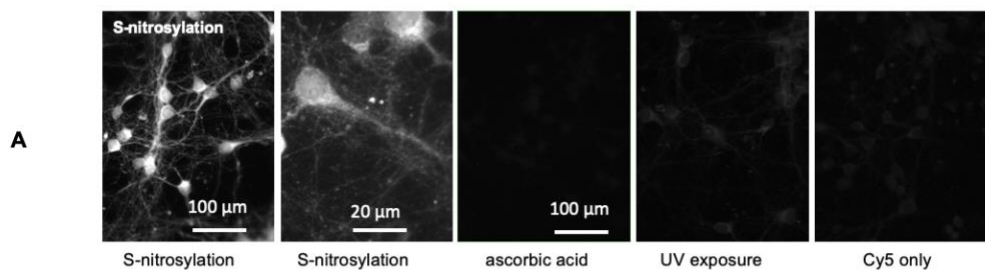

56

57 The establishment of SNOTRAP for chemical staining of S-nitrosylation signals in

58 primary neuron culture. A) Primary cultured neuron cells were treated with SNOTRAP-

59 Cy5 (left 2 columns). To show that SNOTRAP binds specifically to the S-nitrosylated

60 proteins, negative control samples were prepared with SNO-reducing reagent (ascorbic

61 acid or UV light) and SNOTRAP-Cy5 (middle 2 columns, as negative control) or Cy5

62 only (as negative control).

63

64

65

66

**Fig. S3:**

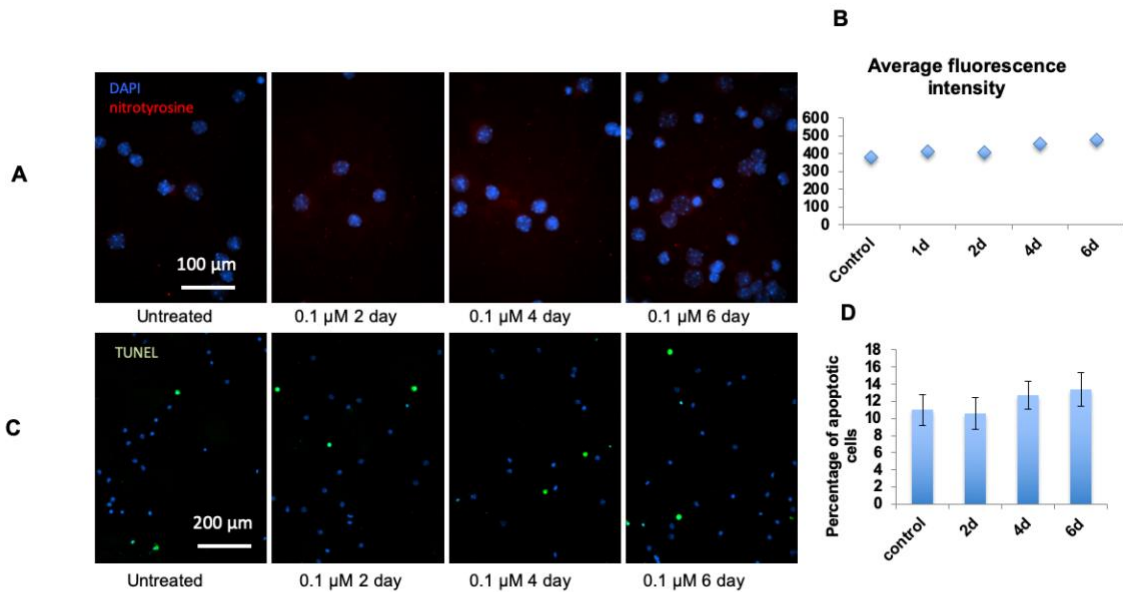

The changes in tyrosine nitration (Ntyr) and apoptosis in cultured neurons was measured following treatment with 0.1  $\mu\text{M}$  SA for 1–6 days. A) The changes of Ntyr were measured using 3-nitrotyrosine immune staining. Quantitative analysis was conducted and is shown on the right; B) no significant difference was found. C) Cell apoptosis was measured using TUNEL assay. Quantitative analysis was conducted and is shown on the right; D) no significant difference was found. All quantification figures were presented as mean and  $\pm$  SEM. One Way Anova was conducted.

79

80

81 **Fig. S4:**

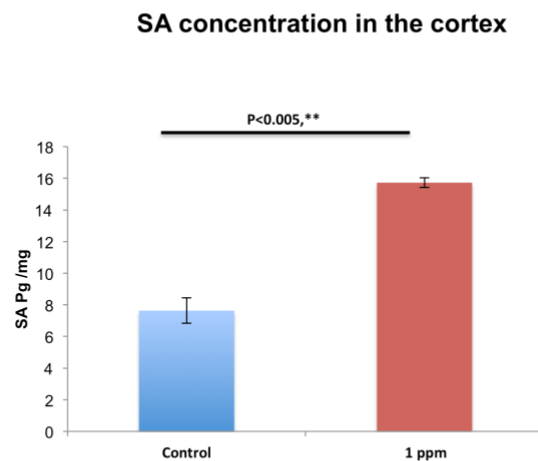

82

83 SA concentration in the cortex in control and 1 ppm SA groups. The multiple reaction  
84 monitoring (MRM) mode of a triple quadrupole mass spectrometer (QQ MS) was used  
85 to establish a sensitive and selective quantification method. Presented as mean and  $\pm$   
86 SEM. One tailed t-test was conducted.  $P < 0.005^{**}$ , control mice (n=5), 1 ppm SA mice  
87 (n=5).

88

89

90

91

92

93 **Captions for Tables S1 to S4**

94 **Table S1:** Lists of SNO proteins in the different groups following treatment and after

95 recovery.

96 **Table S2:** Gene Ontology analysis of the different groups following treatment and after

97 recovery. Top 30 significant terms.

98 **Table S3:** List of SNO proteins and GO analysis of the 35 proteins that are common

99 between SA 0.1 ppm and 1 ppm groups.

100 **Table S4:** GO analysis of the exclusively proteins following recovery and treatment of

101 0.1 ppm and 1 ppm.

102 **Caption for Movie S1**

103 **Movie S1:** using the calcium-sensing dye Fluo-4/AM, it was found that the concentration

104 of calcium rapidly increased after addition of 0.1  $\mu$ M SA for 5 seconds.

105

106

107

108
